# Supplementary material for: Visible-light-driven photocatalytic reduction of Cr(vi) on magnetite/carboxylate-rich carbon sheets
Source: Royal Society of Chemistry journal article supplement (doi:10.1039/c7nj01800b), 2017-01-01
Supplement: c7nj01800b1.pdf [file c7nj01800b1.pdf]

## Supporting Information for

### Visible-light-driven photocatalytic reduction of Cr (VI) on magnetite/carboxylate-rich carbon sheets

Zhijun Luo <sup>a,b,c</sup>, Jing Wang <sup>a</sup>, Lingling Qu <sup>d</sup>, Jianzhong Jia <sup>a</sup>, Suying Jiang <sup>b,c</sup>, Xiangtong Zhou  
<sup>a</sup>, Xiangyang Wu <sup>a\*</sup>, Zhiren Wu <sup>a,b,c\*</sup>

<sup>a</sup> School of The Environment, Jiangsu University, Zhenjiang, 212013 P. R. China;

**E-mail address: [wwu5353@j-c-k.co.jp](mailto:wwu5353@j-c-k.co.jp)**

<sup>b</sup> Engineering Technology Center for Heavy Metal Wastewater Treatment and Recovery, Environmental Protection Department of Jiangsu Province, Yixing, 212013 P. R. China;

<sup>c</sup> Jiangsu ATK Environment Engineering Design and Research Institute Co., LTD, Yixing, 212013 P. R. China;

<sup>d</sup> School of Chemistry and Chemical Engineering, Jiangsu University, Zhenjiang, 212013 P. R. China;

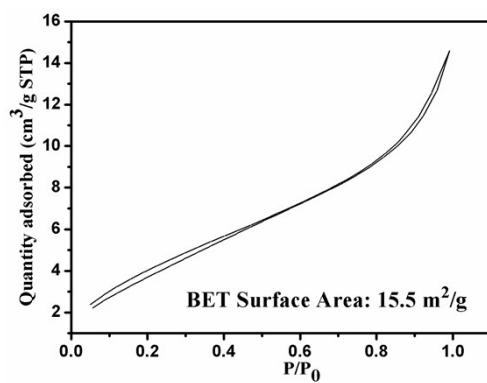

Fig. S1. Nitrogen adsorption/desorption isotherms of MCRCS<sub>s</sub>

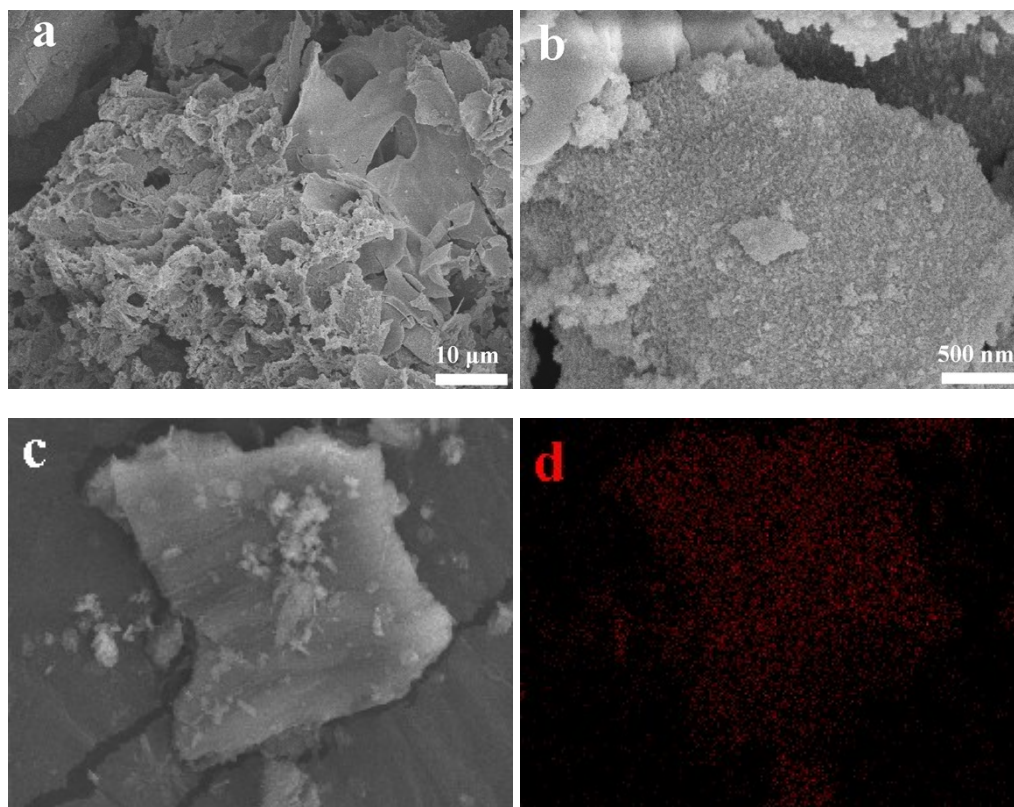

Fig. S2. (a and b) SEM images, SEM image (c) and the corresponding EDS mapping data for Cr (d) of MCRCS<sub>s</sub> obtained after four cycles of the photoreduction of Cr(VI)
